# Supplementary material for: A triboelectric textile templated by a three-dimensionally penetrated fabric
Source: Royal Society of Chemistry journal article supplement (doi:10.1039/c6ta01166g), 2016-01-01
Supplement: c6ta01166g1.pdf [file c6ta01166g1.pdf]

## Supporting Information

### Supporting Videos

**Video S1.** A triboelectric textile (TET) was repeatedly pressed to lighten up a liquid crystal display.

**Video S2.** A TET was repeatedly pressed to lighten up forty-nine light-emitting diodes.

**Video S3.** A TET was integrated into an insole to lighten up a liquid crystal display.

### Supporting Figures

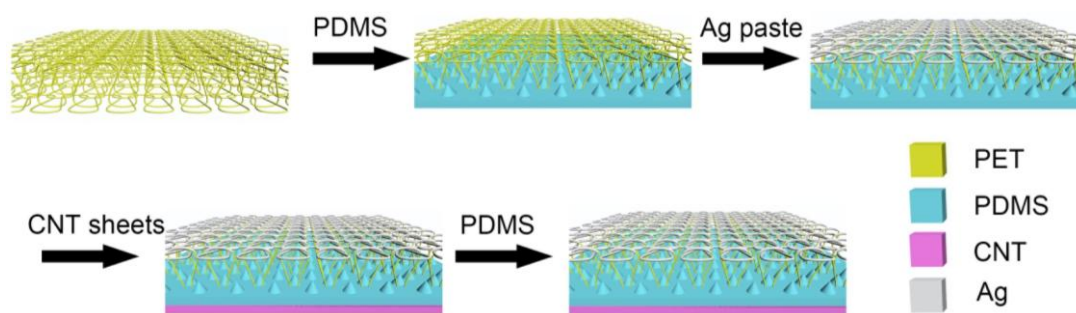

**Figure S1.** Fabrication process of the triboelectric textile (TET).

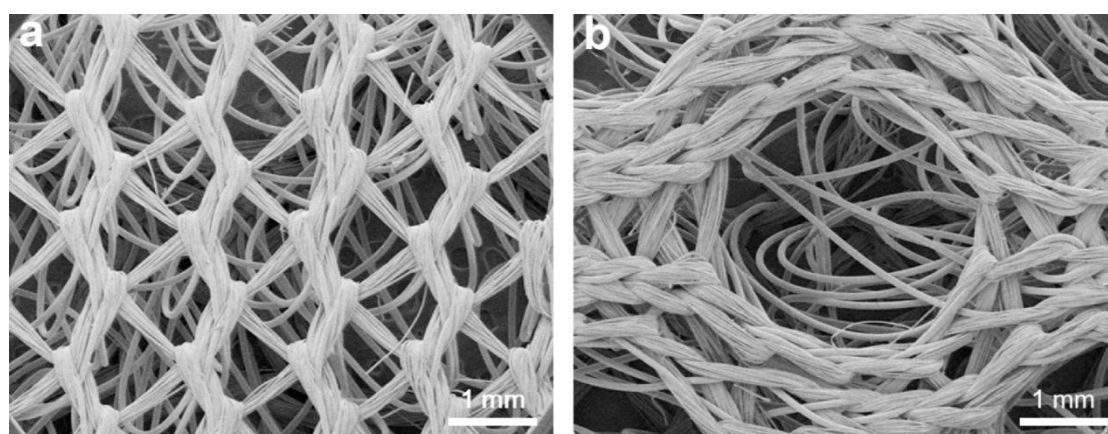

**Figure S2.** Scanning electron microscopy (SEM) images of the top (a) and bottom (b) surfaces of the fabric from poly (ethylene terephthalate) (PET) fibers.

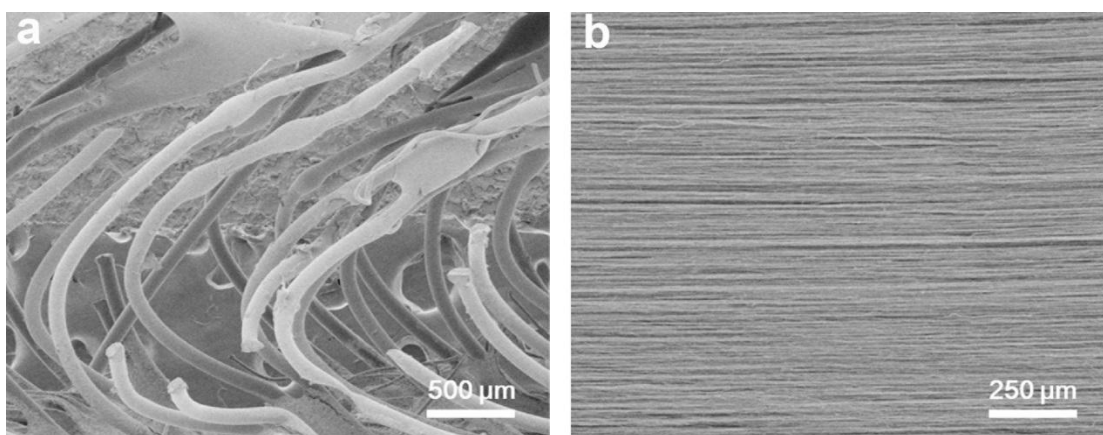

**Figure S3.** SEM images of the middle part of a pressed TET (a) and aligned carbon nanotube (CNT) sheet (b).

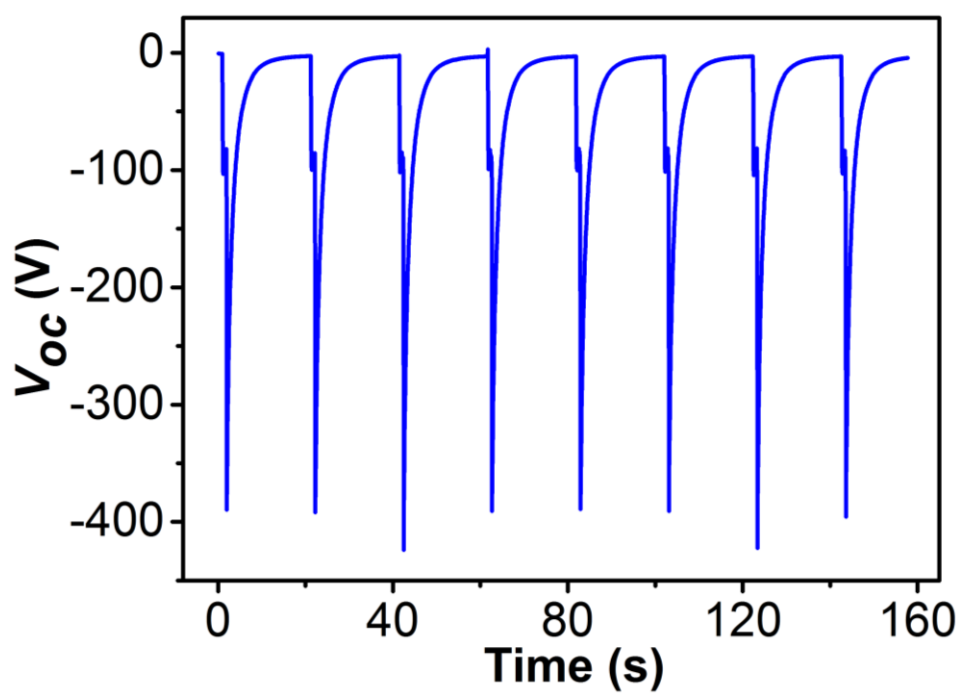

**Figure S4.** Open-circuit voltage of a TET where the output voltage returned to 0. The TET showed a thickness of 8 mm and size of  $5 \times 5 \text{ cm}^2$ .

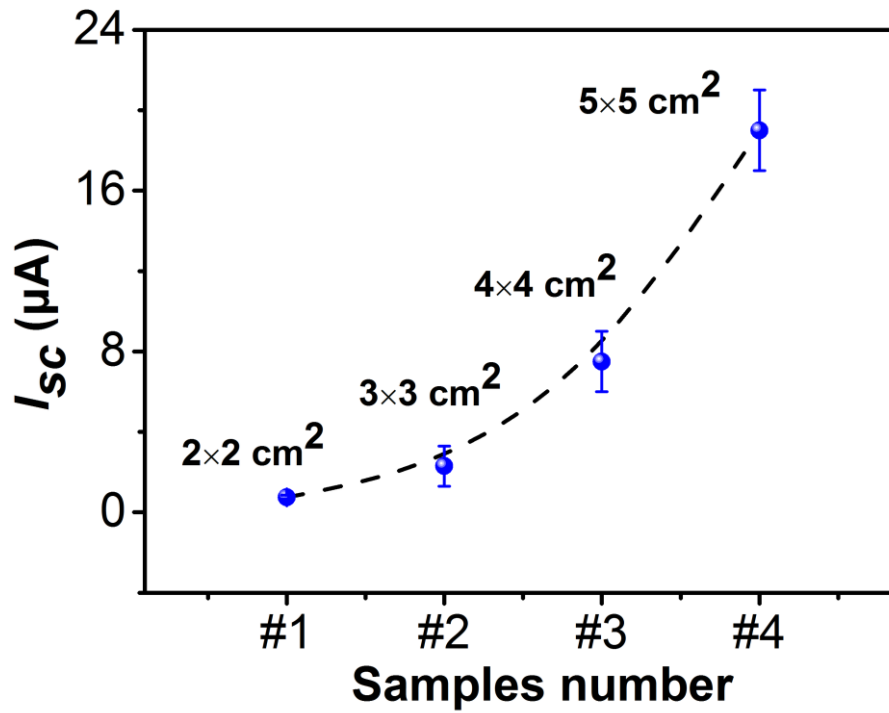

**Figure S5.** Dependence of short-circuit current on size of the TET with the same thickness of 8 mm at a pressing frequency of 1 Hz and force of 16 N per square centimeter.

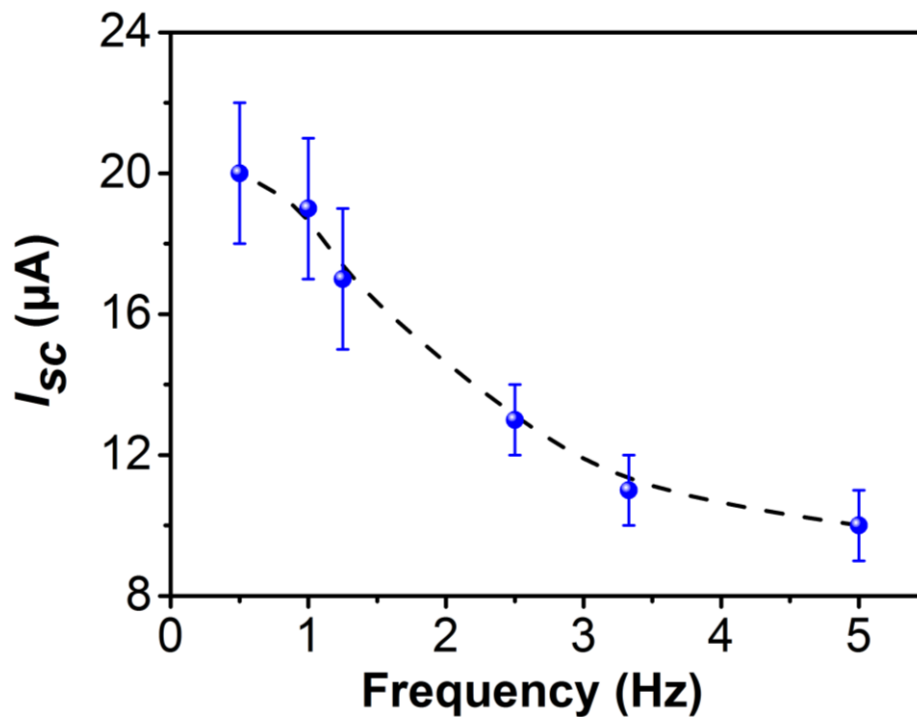

**Figure S6.** Dependence of short-circuit current on pressing frequency at a pressing force of 400 N for a TET with thickness of 8 mm and size of 5×5 cm².

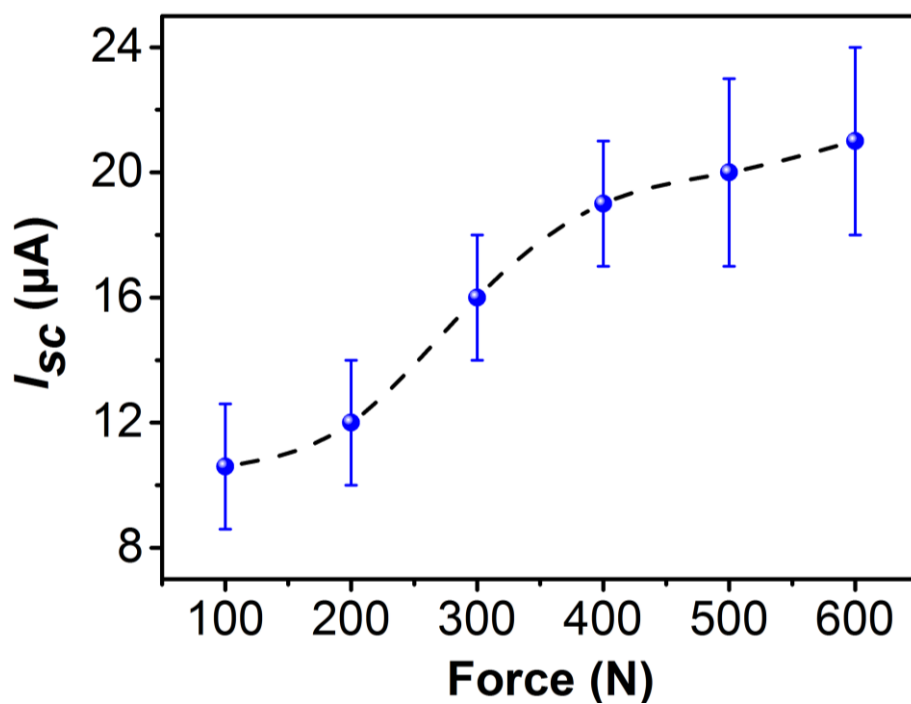

**Figure S7.** Dependence of short-circuit current on pressing force at a pressing frequency of 1 Hz for a TET with thickness of 8 mm and size of  $5 \times 5 \text{ cm}^2$ .

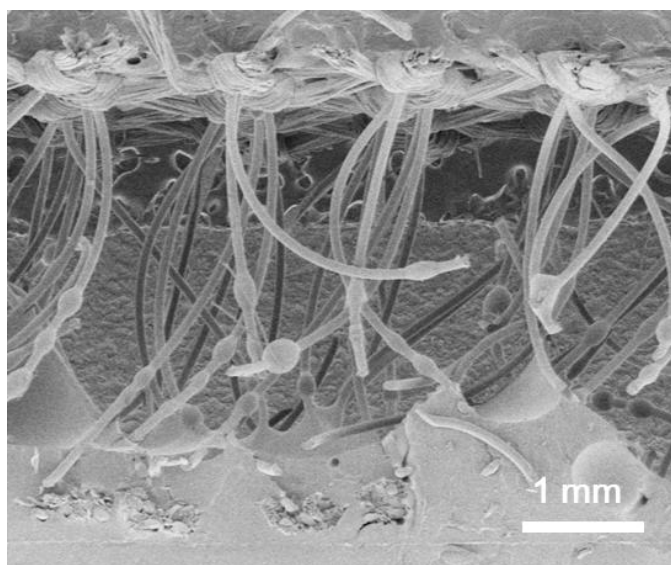

**Figure S8.** SEM image of a TET after pressing for over 3000 cycles.

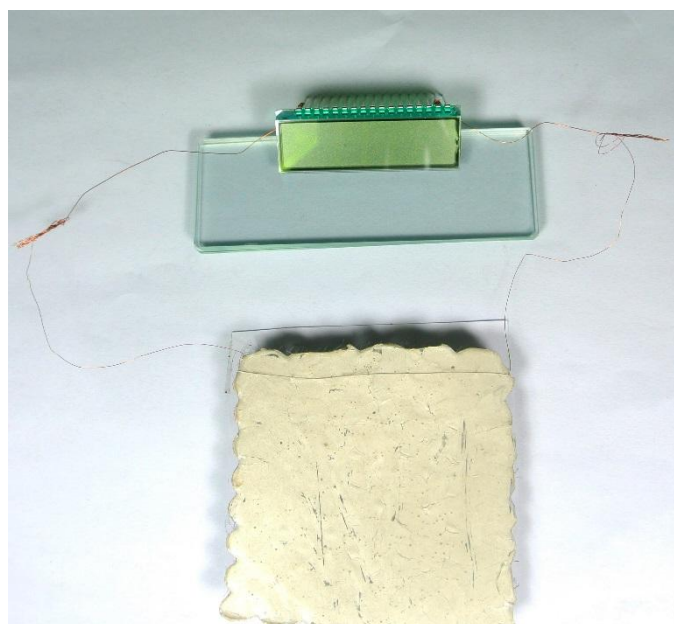

**Figure S9.** Photograph of a LCD being connected with a TET directly.

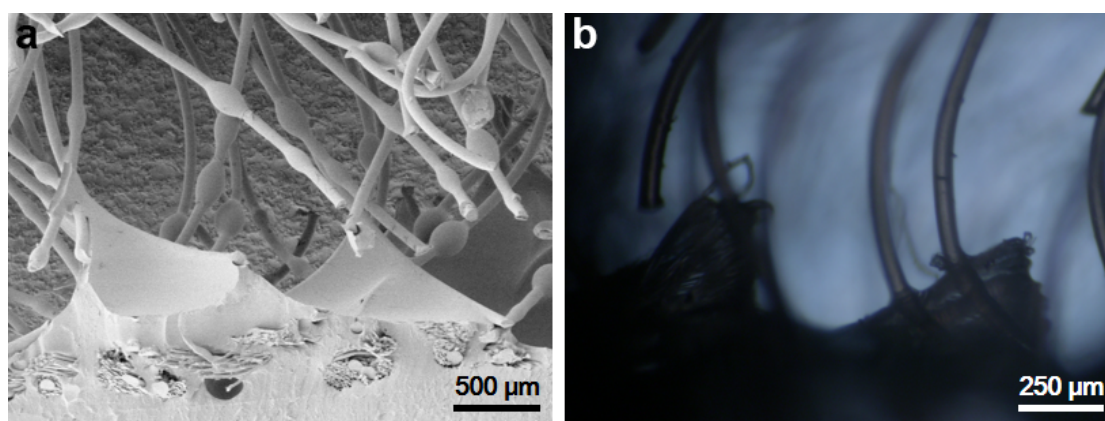

**Figure S10.** SEM image and optical micrograph of the PDMS pyramids.

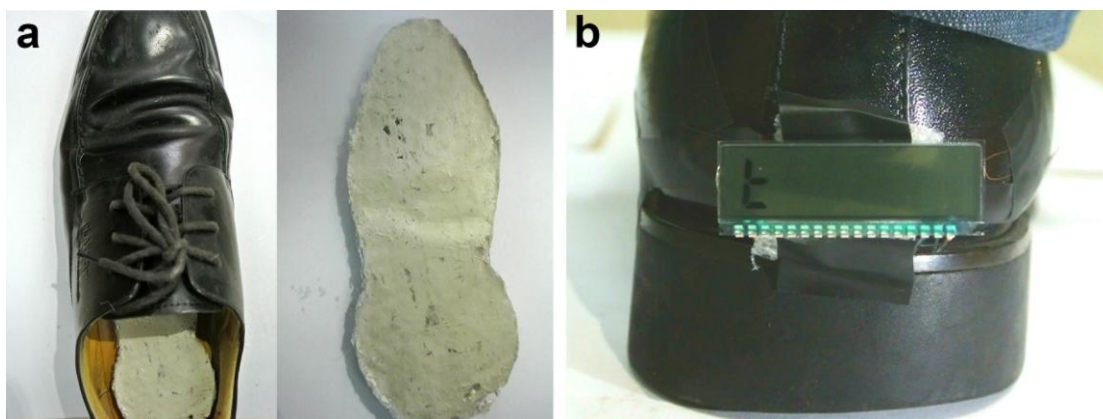

**Figure S11.** An insole made from a TET (a) and a LCD lightened by people walking (b).

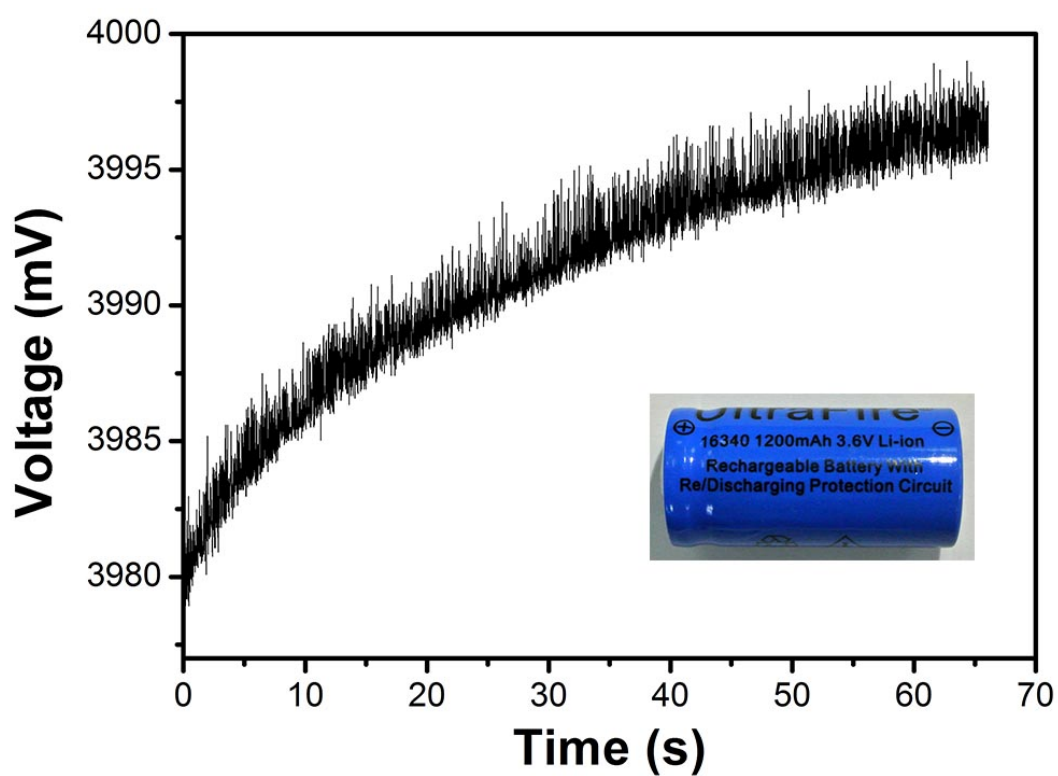

**Figure S12.** The charging curves of a lithium ion battery with a capacity of 1200 mAh by pressing a TET (inset, photograph of the lithium ion battery).
